# Supplementary material for: Protein engineering of multi-enzyme virus-like particle nanoreactors for enhanced chiral alcohol synthesis
Source: Royal Society of Chemistry journal article supplement (doi:10.1039/d3na00515a), 2023-01-01
Supplement: d3na00515a1.pdf [file d3na00515a1.pdf]

Supplementary information

**Protein engineering of multi-enzyme virus-like particle  
nanoreactors for enhanced chiral alcohol synthesis**

Taotao Feng,<sup>1,‡</sup> Jiaxu Liu,<sup>1,‡</sup> Xiaoyan Zhang,<sup>1,‡</sup> Daidi Fan<sup>2</sup>, and Yunpeng Bai<sup>1,\*</sup>

<sup>1</sup>State Key Laboratory of Bioreactor Engineering, Shanghai Collaborative Innovation  
Center for Biomanufacturing, East China University of Science and Technology,  
Shanghai 200237, China

<sup>2</sup>Shaanxi R&D Centre of Biomaterials and Fermentation Engineering, School of  
Chemical Engineering, Northwest University, Xi'an, Shaanxi 710069, China

\*Corresponding author: Yunpeng Bai, ybai@ecust.edu.cn

‡These authors contributed equally.

# Contents

## 1. Figures and tables

**Figure S1.** Michaelis-Menten kinetic assessments of SsCR and BmGDH encapsulated in the wild-type P22-SP-BmGDH-SsCR nanoreactors.

**Figure S2.** Expression and characterization of SP-*BmGDH-SsCR*.

**Figure S3.** SDS-PAGE of pure SsCR by nickel ion affinity chromatography.

**Figure S4.** SDS-PAGE of pure *BmGDH* by nickel ion affinity chromatography.

**Figure S5.** Schematic diagram of protein engineering of P22-SP-*BmGDH-SsCR*.

**Figure S6.** Rescreening the activity of SsCR and *BmGDH* in 24 variants of the nanoreactor P22-SP-*BmGDH-SsCR* M0.

**Figure S7.** Michaelis-Menten kinetic assessments of SsCR and *BmGDH* encapsulated in M0-M5.

**Figure S8.** Michaelis-Menten kinetic assessments of SsCR and *BmGDH* in V0-V5.

**Figure S9.** Conversion of **1a** by the nanoreactors P22-SP-*BmGDH-SsCR* (M0 and M5) and the fusion proteins SP-*BmGDH-SsCR* (V0 and V5).

**Figure S10.** Characterization of P22-SP-*BmGDH-SsCR* M0.

**Table S1.** Catalytic efficiency of M0 variants toward **1a** and glucose.

**Table S2.** Turnover frequency of SP-*BmGDH-SsCR* variants with **1a** and glucose.

**Table S3.** Michaelis-Menten kinetic analysis of SsCR and *BmGDH* in M0–M5.

**Table S4.** Michaelis-Menten kinetic analysis of SP-*BmGDH-SsCR* variants.

**Table S5.** Michaelis-Menten kinetics analysis of *BmGDH* variants.

**Table S6.** Michaelis-Menten kinetics analysis of SsCR variants.

**Table S7.** GC conditions used to determine the enantioselectivity of products.

## 2. GC spectra

## 1. Figures and tables

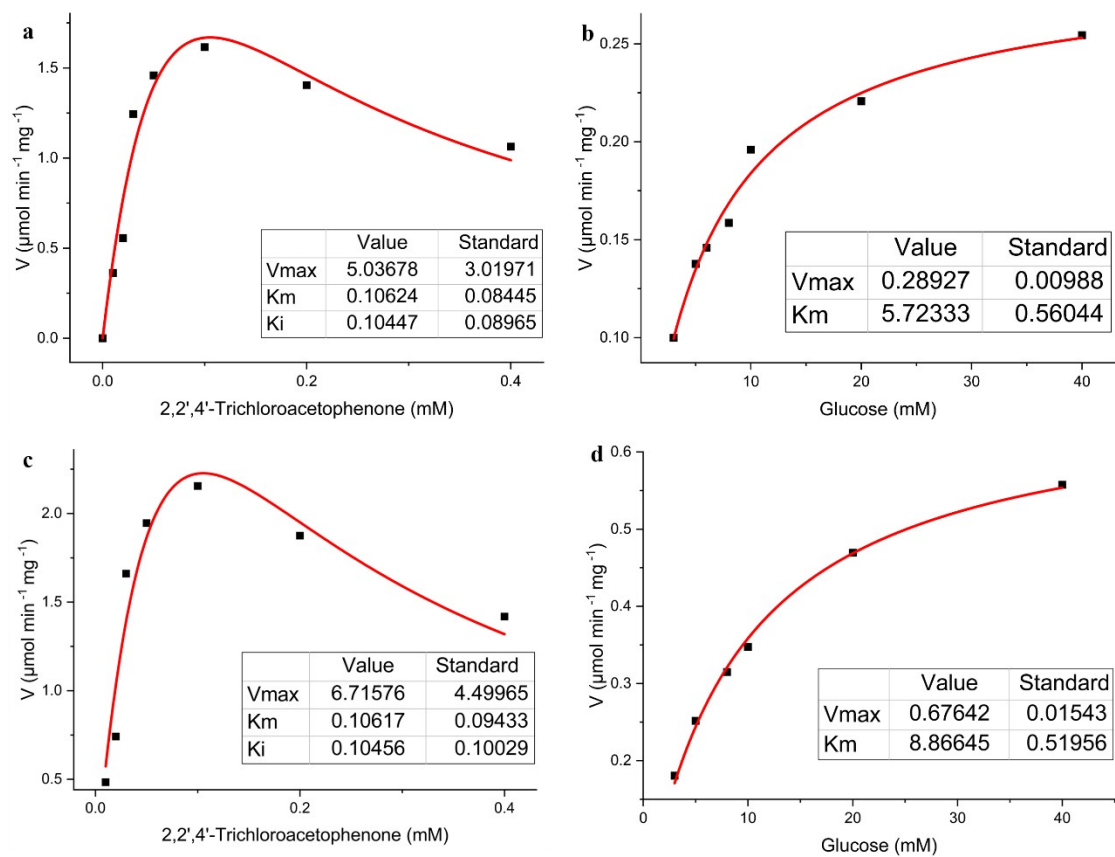

**Figure S1.** Michaelis-Menten kinetic assessments of *SsCR* and *BmGDH* encapsulated in the wild-type P22-SP-*BmGDH-SsCR* nanoreactors assembled from *E. coli* BL21 (DE3) bearing single plasmid (a) (b) and double plasmids (c) (d).

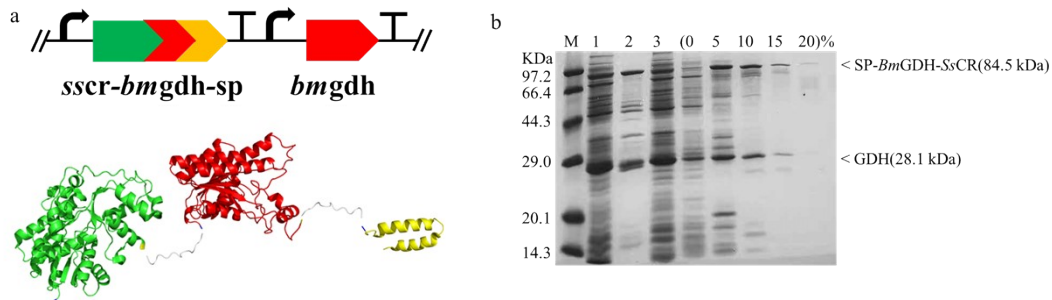

**Figure S2.** Expression and characterization of SP-*BmGDH-SsCR*. (a) Schematic of plasmids for the expression of SP-*BmGDH-SsCR*. (b) SDS-PAGE analysis of SP-*BmGDH-SsCR*. Lanes: M, protein marker; 1 and 2, the supernatant and precipitate obtained from cell lysis; 3, flow-through of protein; 0-20%: elution conditions with different volume ratios of buffer B in the mixed solution of buffer B and buffer A. Buffer A: 20 mM imidazole, 0.5 M NaCl and 20 mM Tris-HCl buffer, pH 7.4; Buffer B: 500 mM imidazole, 0.5 M NaCl and 20 mM Tris-HCl buffer.

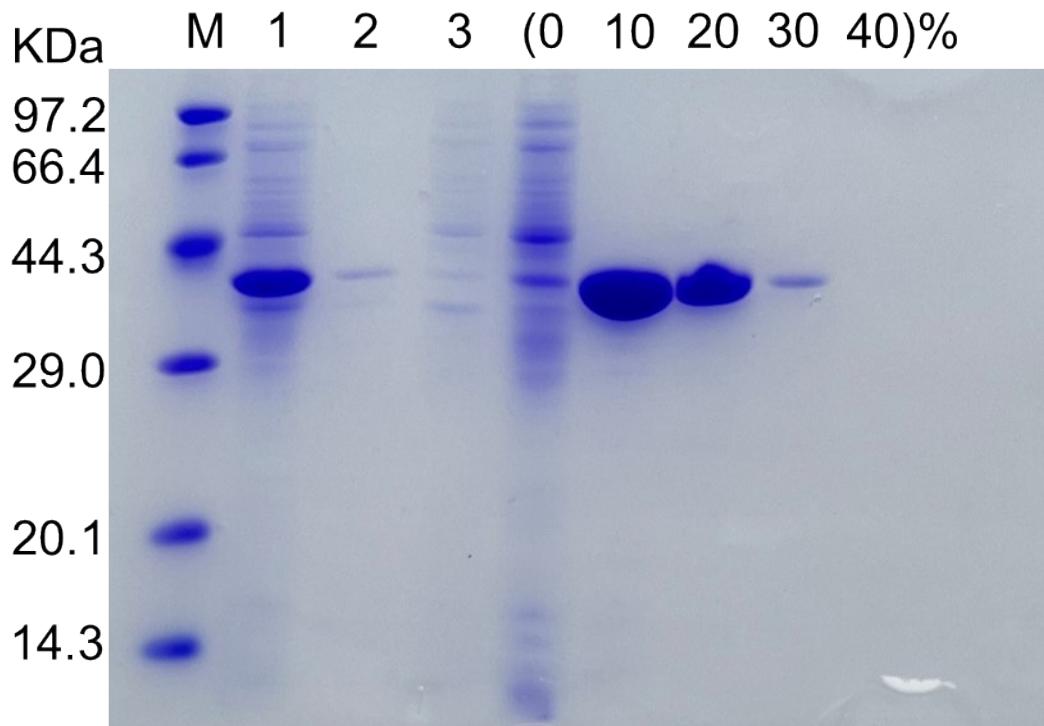

**Figure S3.** SDS-PAGE of pure *SsCR* by nickel ion affinity chromatography. M, Protein standard marker; 1, supernatant of cell lysate; 2, precipitant of cell lysate; 3, flow-through of protein; 0-40%: elution conditions with different volume ratios of buffer B in the mixed solution of buffer B and buffer A. Buffer A: 20 mM imidazole, 0.5 M NaCl and 20 mM Tris-HCl buffer, pH 7.4; Buffer B: 500 mM imidazole, 0.5 M NaCl and 20 mM Tris-HCl buffer.

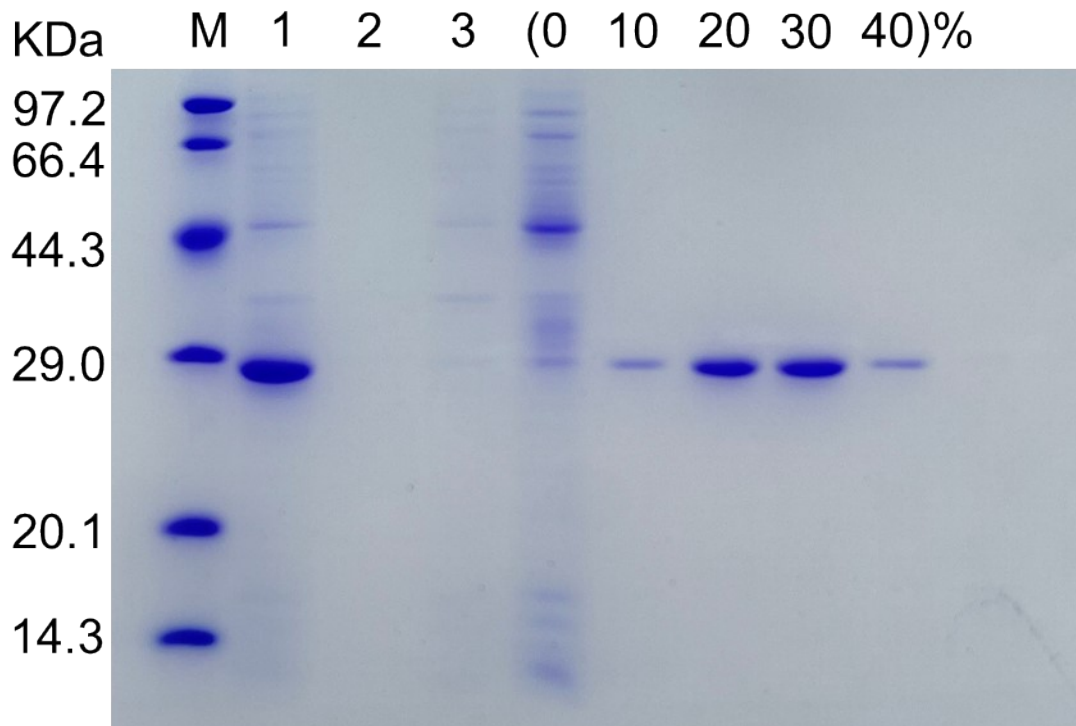

**Figure S4.** SDS-PAGE of pure *BmGDH* by nickel ion affinity chromatography. M, Protein standard marker; 1, supernatant of cell lysate; 2, precipitant of cell lysate; 3, flow-through of protein; 0-40%: elution conditions with different volume ratios of buffer B in the mixed solution of buffer B and buffer A. Buffer A: 20 mM imidazole, 0.5 M NaCl and 20 mM Tris-HCl buffer, pH 7.4; Buffer B: 500 mM imidazole, 0.5 M NaCl and 20 mM Tris-HCl buffer.

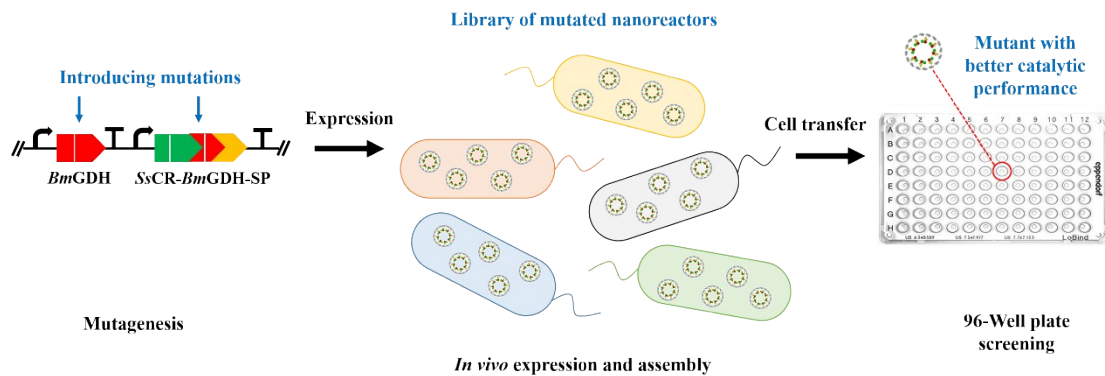

**Figure S5.** Schematic diagram of protein engineering of P22-SP-*BmGDH-SsCR*. Error-prone PCR was applied to both *BmGDH* and *SsCR-BmGDH-SP* to introduce mutations (white lines) in the plasmid. The mutated genes were transferred into *E. coli* BL21 (DE3) for the expression and self-assembly of P22-SP-*BmGDH-SsCR* nanoreactors. The single cell colonies of *E. coli* were cultured in agar plate and then transferred into 96-plate well. Cells were lysed and substrate was added for the screening of catalytic activity.

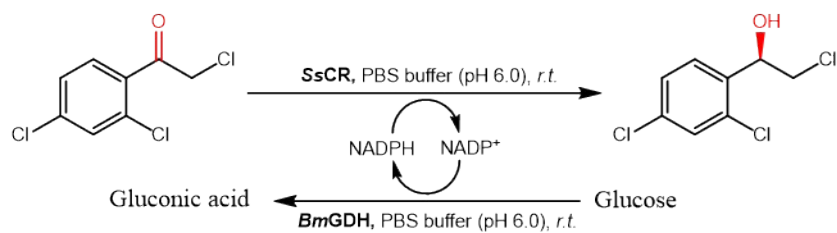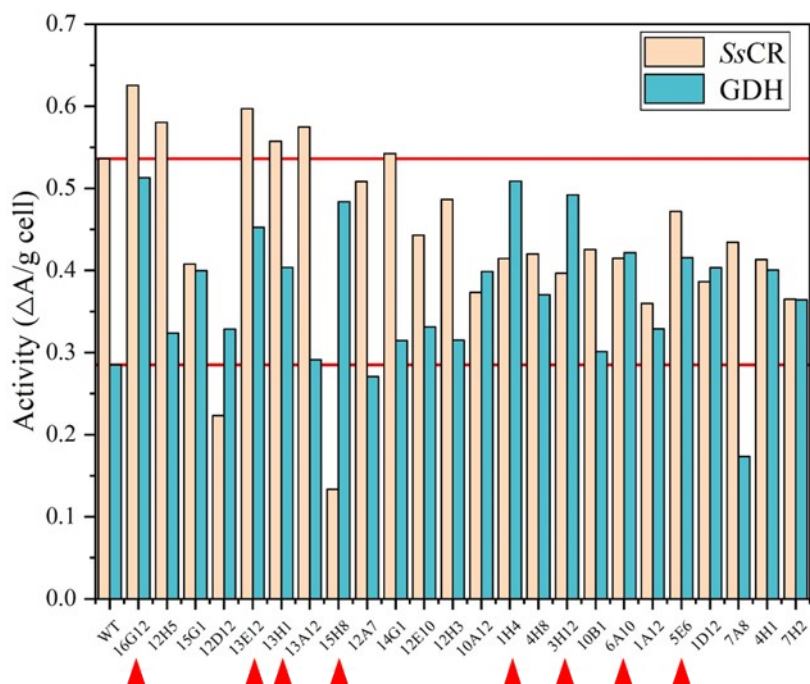

**Figure S6.** Rescreening the activity of *SsCR* and *BmGDH* in 24 variants of the nanoreactor P22-SP-*BmGDH*-*SsCR* M0. The arrows indicate the better variants which were subsequently used for sequencing.



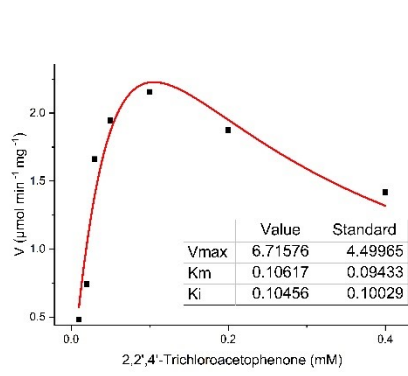

M0-SsCR

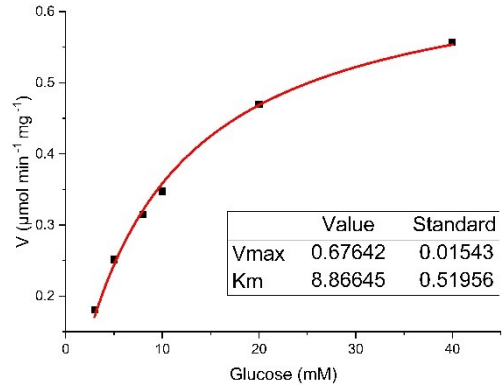

M0-BmGDH

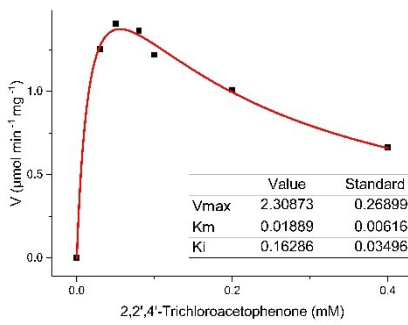

M1-SsCR

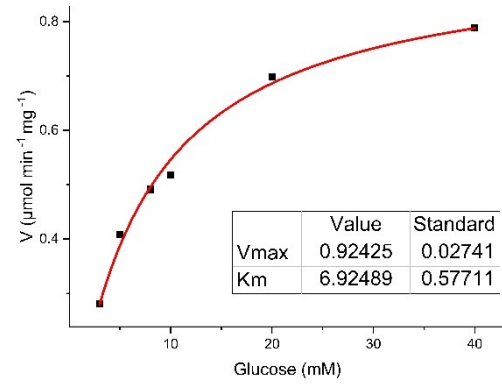

M1-BmGDH

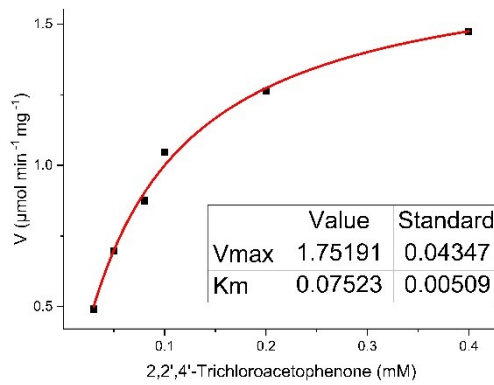

M2-SsCR

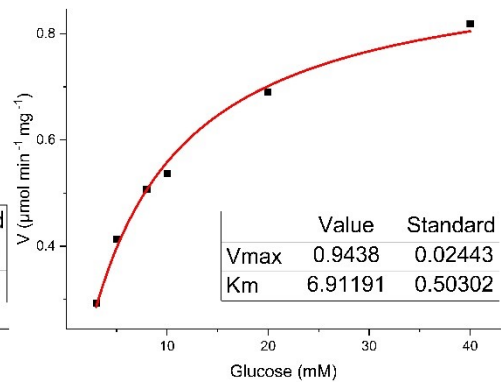

M2-BmGDH

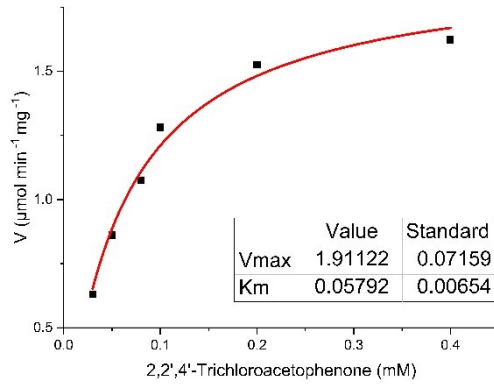

M3-SsCR

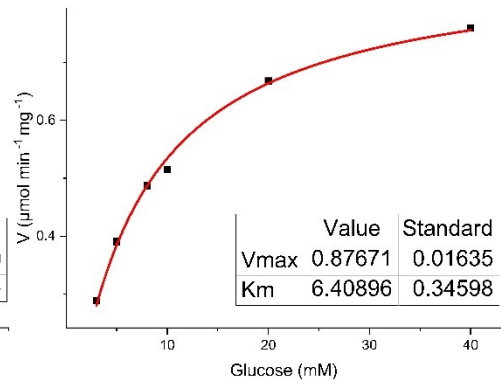

M3-BmGDH

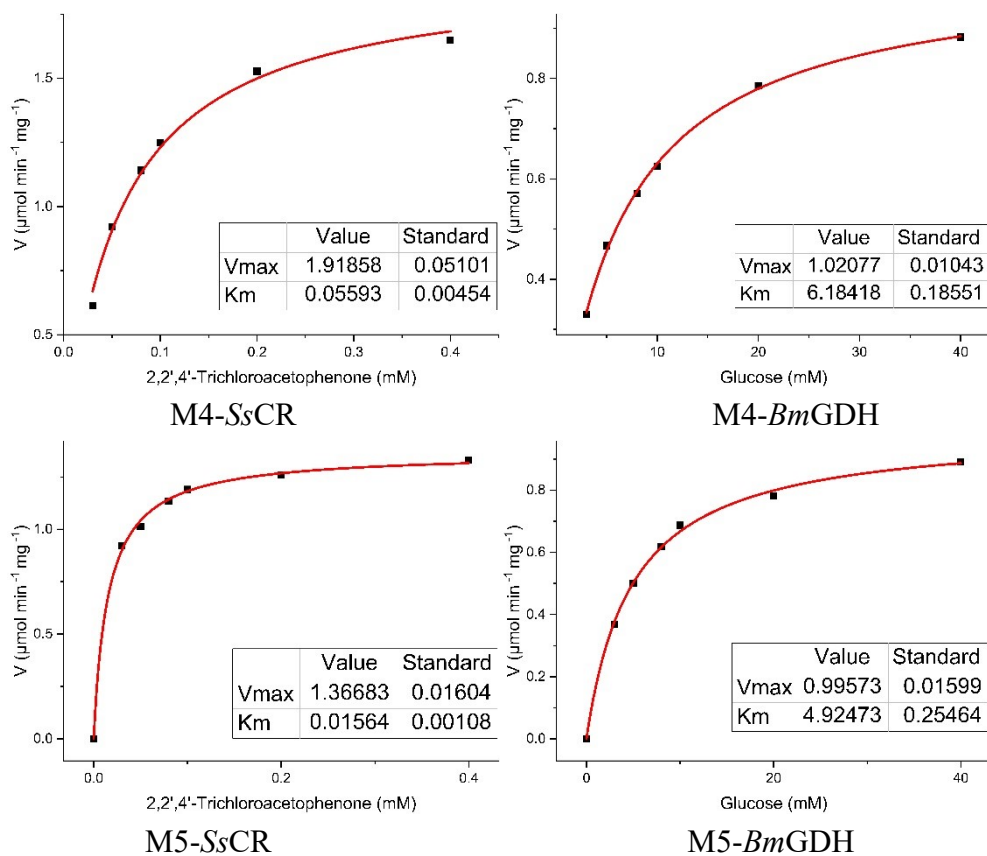

**Figure S7.** Michaelis-Menten kinetic assessments of *SsCR* and *BmGDH* encapsulated in M0-M5.

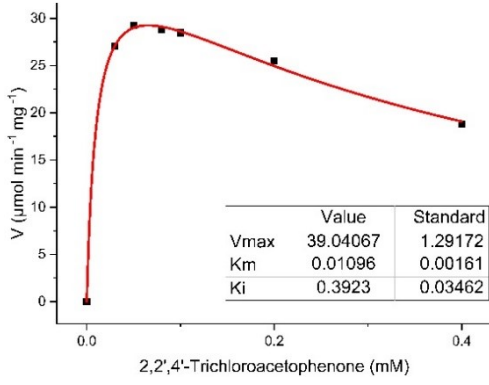

V0-SsCR

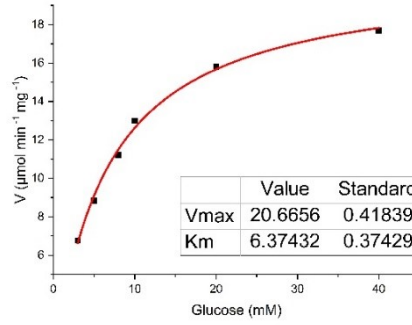

V0-BmGDH

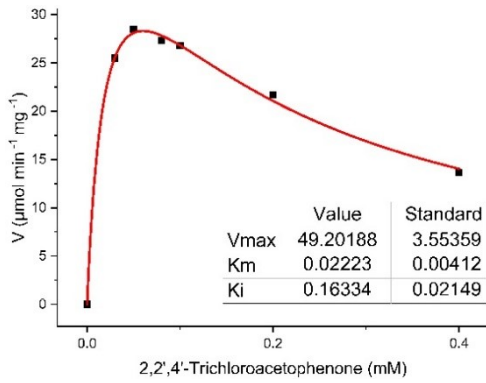

V1-SsCR

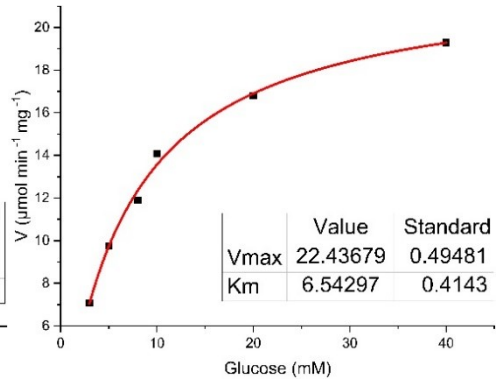

V1-BmGDH

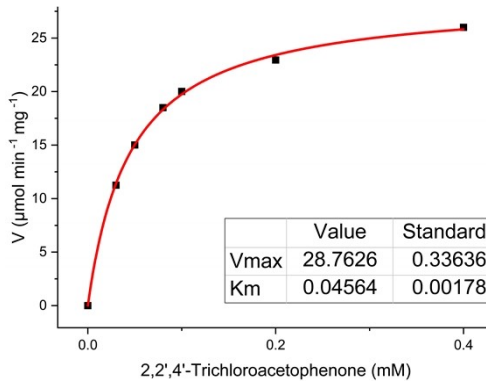

V2-SsCR

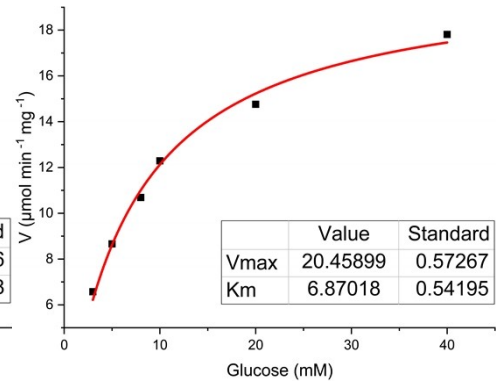

V2-BmGDH

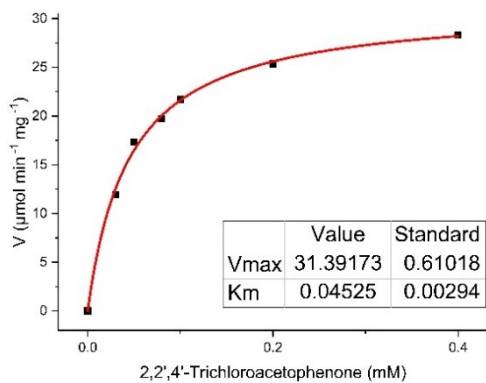

V3-SsCR

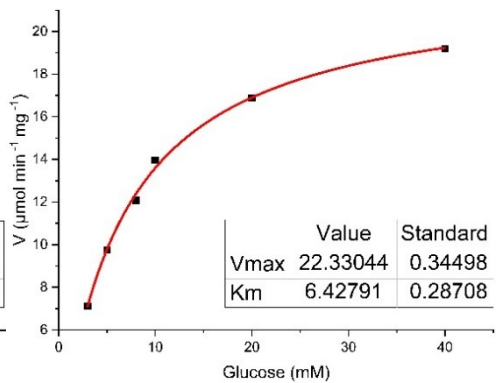

V3-BmGDH

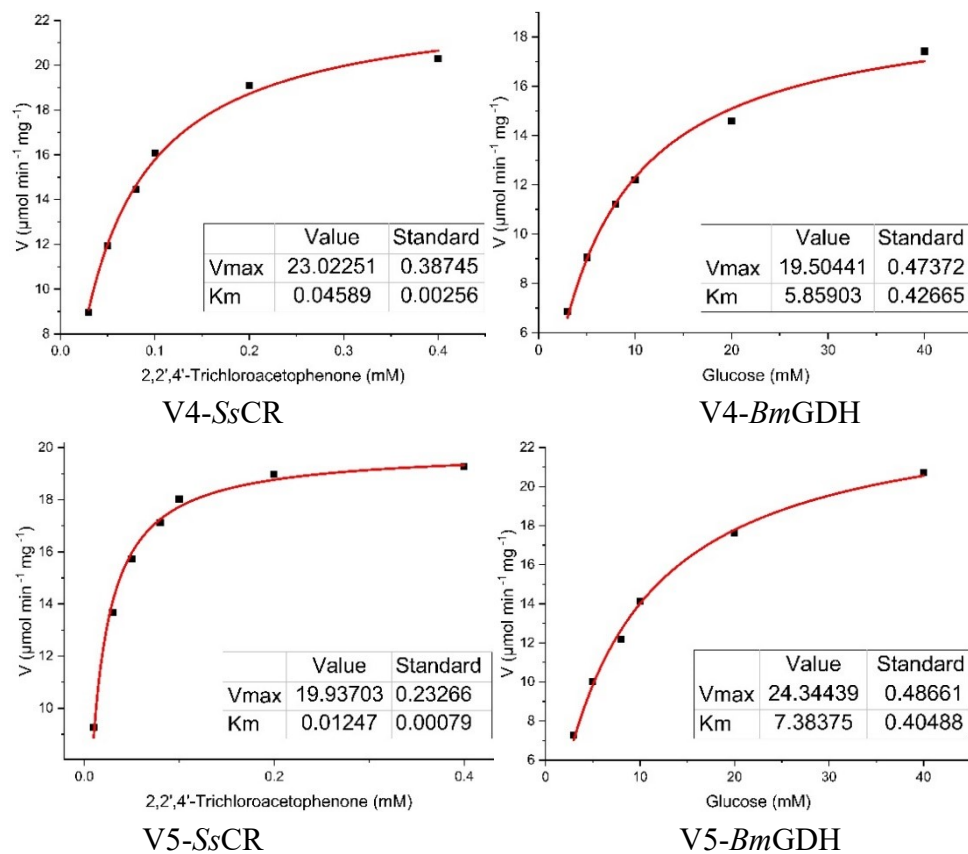

**Figure S8.** Michaelis-Menten kinetic assessments of *SsCR* and *BmGDH* in V0-V5.

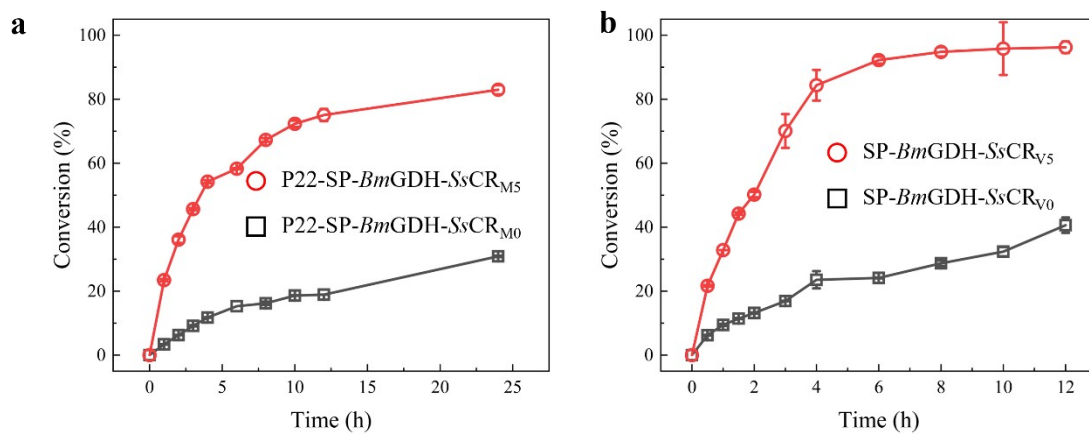

**Figure S9.** Conversion of **1a** by the nanoreactors P22-SP-*BmGDH-SsCR* (M0 and M5) and the fusion proteins SP-*BmGDH-SsCR* (V0 and V5). (a) The time-course conversion of 10 mM **1a** by P22-SP-*BmGDH-SsCR* M0 and M5 with 10  $\mu$ M NADPH cofactor concentration. (b) The time-course conversion of 10 mM **1a** by SP-*BmGDH-SsCR* V0 and V5.

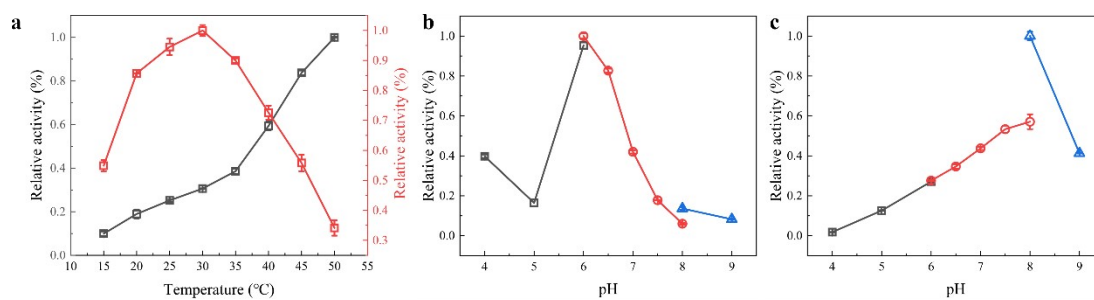

**Figure S10.** Characterization of P22-SP-*BmGDH-SsCR* M0. (a) Characterization of the optimal reaction temperature of *SsCR* (red square) and *BmGDH* (black square) encapsulated in M0. (b) Characterization of the optimal reaction pH of *SsCR* encapsulated in M0 (black square: sodium citrate buffer; Red circle: sodium phosphate buffer; Blue triangle: Tris – HCl buffer). (c) Characterization of the optimal reaction pH of *BmGDH* encapsulated in M0 (black square: sodium citrate buffer; Red circle: sodium phosphate buffer; Blue triangle: Tris – HCl buffer).

**Table S1.** Catalytic efficiency of M0 variants toward **1a** and glucose

| Entry | Mutants | Mutations | $k_{\text{cat}}/K_{\text{m}}$                  | Fold | $k_{\text{cat}}/K_{\text{m}}$                   | Fold |
|-------|---------|-----------|------------------------------------------------|------|-------------------------------------------------|------|
|       |         |           | <i>SsCR</i> ( $\text{s}^{-1} \text{mM}^{-1}$ ) |      | <i>BmGDH</i> ( $\text{s}^{-1} \text{mM}^{-1}$ ) |      |
| 1     | M0      | -         | $375.0 \pm 416.8$                              | 1.0  | $0.113 \pm 0.007$                               | 1.0  |
| 2     | M1      | V356A     | $723.4 \pm 250.5$                              | 1.9  | $0.197 \pm 0.017$                               | 1.7  |
| 3     | M1-1    | T208A     | $477.8 \pm 214.5$                              | 1.3  | $0.928 \pm 0.019$                               | 0.82 |
| 4     | M1-2    | L209S     | $656.7 \pm 358.4$                              | 1.8  | $0.103 \pm 0.059$                               | 0.91 |

**Table S2.** Turnover frequency of SP-*Bm*GDH-*Ss*CR variants with **1a** and glucose.

| Entry | Enzyme | Mutations                         | [ <b>1a</b> ]<br>(mM) | Glucose<br>(mM) | NADP <sup>+</sup><br>(mM) | Conv<br>[%] <sup>[b]</sup> | TOF<br>[min <sup>-1</sup> ] <sup>[c]</sup> | Folds |
|-------|--------|-----------------------------------|-----------------------|-----------------|---------------------------|----------------------------|--------------------------------------------|-------|
| 1     | V0     | -                                 | 1                     | 10              | 1                         | 4.0                        | $1.1 \times 10^2$                          | 1     |
| 2     | V1     | V356A                             | 1                     | 10              | 1                         | 5.1                        | $1.5 \times 10^2$                          | 1.3   |
| 3     | V2     | V356A/L211H                       | 1                     | 10              | 1                         | 12.7                       | $3.6 \times 10^2$                          | 3.2   |
| 4     | V3     | V356A/L211H/S743G                 | 1                     | 10              | 1                         | 12.4                       | $3.5 \times 10^2$                          | 3.1   |
| 5     | V4     | V356A/L211H/S743G/S445H           | 1                     | 10              | 1                         | 14.0                       | $4.0 \times 10^2$                          | 3.5   |
| 6     | V5     | V356A/L211H/S743G/S445H/V193<br>T | 1                     | 10              | 1                         | 7.3                        | $2.0 \times 10^2$                          | 1.8   |

[a] Reaction conditions: using 0.1 mg SP-*Bm*GDH-*Ss*CR, PBS (10 mL, 100 mM, pH 6.0), 20 vol % DMSO at room temperature (30 °C). [b] GC conversion to **2a** at 1 h. [c] P22-*Bm*GDH-*Ss*CR turnover frequency (mol **1a** converted per mol SP-*Bm*GDH-*Ss*CR per min) was calculated after 60 minutes.





**Table S3.** Michaelis-Menten kinetic analysis of *SsCR* and *BmGDH* in M0–M5.

| Entry | Mutants | Mutations                         | $k_{\text{cat}}$ (s <sup>-1</sup> ) | $K_{\text{m}}$ (mM) | $k_{\text{cat}}/K_{\text{m}}$                   | Fold <sup>a</sup> | $k_{\text{cat}}$ (s <sup>-1</sup> ) | $K_{\text{m}}$ (mM) | $k_{\text{cat}}/K_{\text{m}}$                    | Fold <sup>b</sup> |
|-------|---------|-----------------------------------|-------------------------------------|---------------------|-------------------------------------------------|-------------------|-------------------------------------|---------------------|--------------------------------------------------|-------------------|
|       |         |                                   |                                     |                     | <i>SsCR</i> (s <sup>-1</sup> mM <sup>-1</sup> ) |                   |                                     |                     | <i>BmGDH</i> (s <sup>-1</sup> mM <sup>-1</sup> ) |                   |
| 1     | M0      | -                                 | 39.7 ± 26.6                         | 0.106 ± 0.094       | 375.0 ± 416.8                                   | 1.0               | 1.001 ± 0.023                       | 8.866 ± 0.520       | 0.113 ± 0.007                                    | 1.0               |
| 2     | M1      | V356A                             | 13.7 ± 1.6                          | 0.019 ± 0.006       | 723.4 ± 250.5                                   | 1.9               | 1.367 ± 0.041                       | 6.925 ± 0.577       | 0.197 ± 0.017                                    | 1.7               |
| 3     | M2      | V356A/L211H                       | 10.4 ± 0.3                          | 0.075 ± 0.005       | 138.3 ± 9.8                                     | 0.4               | 1.397 ± 0.036                       | 6.912 ± 0.503       | 0.202 ± 0.016                                    | 1.8               |
| 4     | M3      | V356A/L211H<br>/ S743G            | 11.3 ± 0.4                          | 0.058 ± 0.007       | 195.0 ± 24.7                                    | 0.5               | 1.297 ± 0.024                       | 6.409 ± 0.346       | 0.203 ± 0.012                                    | 1.8               |
| 5     | M4      | V356A/L211H<br>/S743G/S445H       | 11.4 ± 0.3                          | 0.056 ± 0.005       | 203.0 ± 17.3                                    | 0.5               | 1.510 ± 0.015                       | 6.184 ± 0.186       | 0.244 ± 0.008                                    | 2.2               |
| 6     | M5      | V356A/L211H<br>/S743G/S445H/V193T | 8.1 ± 0.1                           | 0.016 ± 0.001       | 517.3 ± 36.2                                    | 1.4               | 1.473 ± 0.024                       | 4.925 ± 0.255       | 0.299 ± 0.016                                    | 2.6               |

<sup>a</sup>Fold:  $k_{\text{cat}}/K_{\text{m}}$  of *SsCR* in M0–M5 compared with that of M0. <sup>b</sup>Fold:  $k_{\text{cat}}/K_{\text{m}}$  of *BmGDH* in M0–M5 compared with that of M0.

| Entry | Mutants | Mutations                             | $k_{\text{cat}}$ (s <sup>-1</sup> ) | $K_{\text{m}}$ (mM) | $k_{\text{cat}}/K_{\text{m}}$                   | Fold <sup>a</sup> | $k_{\text{cat}}$ (s <sup>-1</sup> ) | $K_{\text{m}}$ (mM) | $k_{\text{cat}}/K_{\text{m}}$                    | Fold <sup>b</sup> |
|-------|---------|---------------------------------------|-------------------------------------|---------------------|-------------------------------------------------|-------------------|-------------------------------------|---------------------|--------------------------------------------------|-------------------|
|       |         |                                       |                                     |                     | <i>SsCR</i> (s <sup>-1</sup> mM <sup>-1</sup> ) |                   |                                     |                     | <i>BmGDH</i> (s <sup>-1</sup> mM <sup>-1</sup> ) |                   |
| 1     | V0      | -                                     | 109.9 ± 3.6                         | 0.011 ± 0.002       | 10026.8 ± 1509.8                                | 1.0               | 14.5 ± 0.3                          | 6.374 ± 0.374       | 2.281 ± 0.142                                    | 1.0               |
| 2     | V1      | V356A                                 | 138.5 ± 10.0                        | 0.022 ± 0.004       | 6230.1 ± 1239.2                                 | 0.6               | 15.8 ± 0.3                          | 6.543 ± 0.414       | 2.413 ± 0.162                                    | 1.1               |
| 3     | V2      | V356A/L211H                           | 81.0 ± 0.9                          | 0.046 ± 0.002       | 1773.9 ± 72.2                                   | 0.18              | 14.4 ± 0.4                          | 6.870 ± 0.542       | 2.096 ± 0.175                                    | 0.92              |
| 4     | V3      | V356A/L211H<br>/S743G                 | 88.4 ± 1.7                          | 0.045 ± 0.003       | 1952.8 ± 132.4                                  | 0.19              | 15.7 ± 0.2                          | 6.428 ± 0.287       | 2.445 ± 0.116                                    | 1.1               |
| 5     | V4      | V356A/L211H<br>/S743G/S445H           | 64.8 ± 1.1                          | 0.046 ± 0.003       | 1412.2 ± 82.3                                   | 0.14              | 13.7 ± 0.3                          | 5.859 ± 0.427       | 2.343 ± 0.180                                    | 1.0               |
| 6     | V5      | V356A/L211H<br>/S743G/S445H/V19<br>3T | 59.1 ± 0.7                          | 0.012 ± 0.001       | 4500.3 ± 289.9                                  | 0.45              | 17.1 ± 0.3                          | 7.384 ± 0.405       | 2.320 ± 0.135                                    | 1.0               |

**Table S4.** Michaelis-Menten kinetic analysis of SP-*BmGDH-SsCR* variants.

<sup>a</sup>Fold:  $k_{\text{cat}}/K_m$  of *SsCR* in V0–V5 compared with that of V0. <sup>b</sup>Fold:  $k_{\text{cat}}/K_m$  of *BmGDH* variants in V0–V5 compared with that of V0.

**Table S5.** Michaelis-Menten kinetics analysis of *BmGDH* variants.

| Glucose                          |                |                              |                                                   |       |
|----------------------------------|----------------|------------------------------|---------------------------------------------------|-------|
| Mutant                           | $K_m$ (mM)     | $k_{cat}$ (s <sup>-1</sup> ) | $k_{cat}/K_m$ (s <sup>-1</sup> mM <sup>-1</sup> ) | Folds |
| WT                               | 7.717 ± 0.572  | 32.89 ± 0.90                 | 4.262 ± 0.337                                     | 1.0   |
| V11A (V356A)                     | 10.948 ± 0.982 | 44.65 ± 1.68                 | 4.078 ± 0.397                                     | 0.95  |
| V11A<br>(V356A)/S100H<br>(S445H) | 6.252 ± 0.294  | 35.04 ± 0.56                 | 5.605 ± 0.279                                     | 1.3   |

**Table S6.** Michaelis-Menten kinetics analysis of *SsCR* variants.

| 2,2,4'-trichloroacetophenone |               |                              |                                                   |       |
|------------------------------|---------------|------------------------------|---------------------------------------------------|-------|
| Mutant                       | $K_m$ (mM)    | $k_{cat}$ (s <sup>-1</sup> ) | $k_{cat}/K_m$ (s <sup>-1</sup> mM <sup>-1</sup> ) | Folds |
| WT                           | 0.015 ± 0.002 | 103.8 ± 4.8                  | 6808.1 ± 1057.1                                   | 1.0   |
| L211H                        | 0.053 ± 0.003 | 57.4 ± 0.9                   | 1090.5 ± 58.9                                     | 0.16  |
| V193T/L211H                  | 0.021 ± 0.001 | 45.2 ± 0.7                   | 2145.9 ± 154.5                                    | 0.32  |

**Table S7.** GC conditions used to determine the enantioselectivity of products.

| Entry | Product                                                                             | Enantioselectivity determination                                                                                             |
|-------|-------------------------------------------------------------------------------------|------------------------------------------------------------------------------------------------------------------------------|
| 2a    | 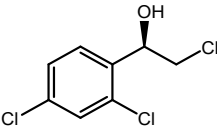   | GC column temperature: 150°C hold for 6 min, 20°C/min to 180 °C                                                              |
| 2b    |    | GC column temperature: 120°C, 2°C/min to 128°C 13 min, 20°C/min to 180°C 3 min                                               |
| 2c    |    | GC column temperature: 100°C hold for 4 min, 5°C/min to 150 °C, 150°C hold for 10 min                                        |
| 2d    |    | GC column temperature: 150°C hold for 6 min, 20°C/min to 180 °C, 180°C hold for 10 min                                       |
| 2e    |   | GC column temperature: 2°C/min from 160°C to 170°C, 170°C hold for 2 min, 1°C/min from 170°C to 180°C, 180°C hold for 15 min |
| 2f    |  | GC column temperature: 140°C hold for 25 min                                                                                 |
| 2g    |  | GC column temperature: 140°C hold for 25 min                                                                                 |
| 2h    |  | GC column temperature: 150°C hold for 6 min, 20°C/min to 180 °C                                                              |
| 2i    |  | GC column temperature: 150°C hold for 6 min, 20°C/min to 180 °C                                                              |

---

2j

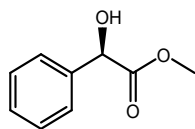

GC column temperature: 140°C hold for  
25 min

---



## 2. GC spectra

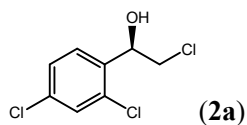

Racemic mixture of 2a

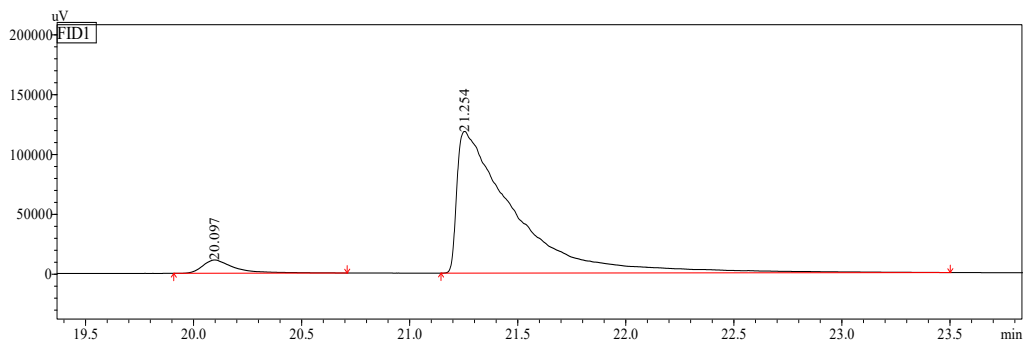

| Peak# | Ret. Time(min) | Height(uV) | Area(uV*s) | Area% |
|-------|----------------|------------|------------|-------|
| 1     | 20.097         | 11112      | 113966     | 8.6   |
| 2     | 21.254         | 118306     | 2182124    | 91.4  |

Reduction with M5

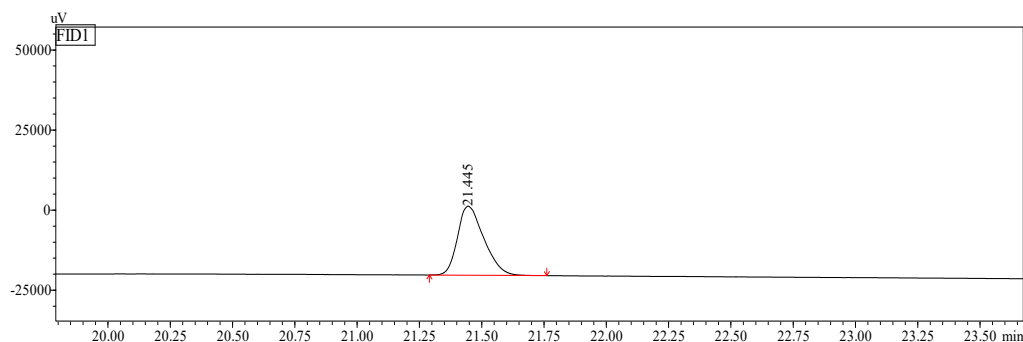

| Peak# | Ret. Time(min) | Height(uV) | Area(uV*s) | Area% |
|-------|----------------|------------|------------|-------|
| 1     | 21.445         | 21542      | 158370     | 100   |

Reduction with M0

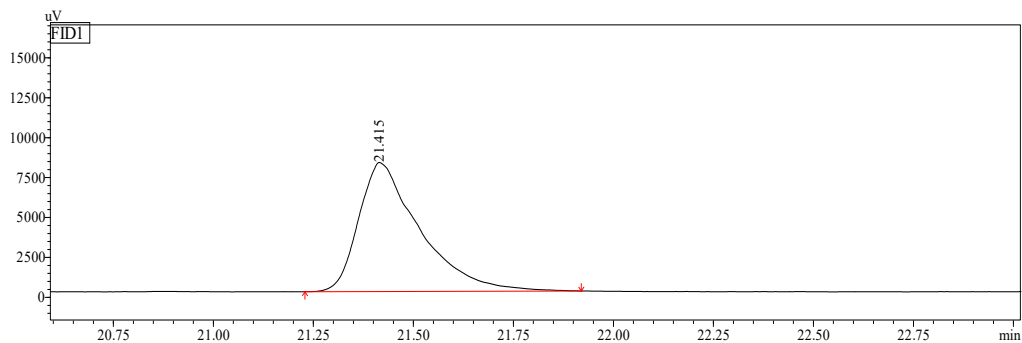

| Peak# | Ret. Time(min) | Height(uV) | Area(uV*s) | Area% |
|-------|----------------|------------|------------|-------|
| 1     | 21.415         | 8070       | 85657      | 100   |

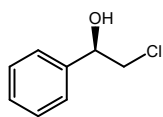

**(2b)**

Racemic mixture of **2b**

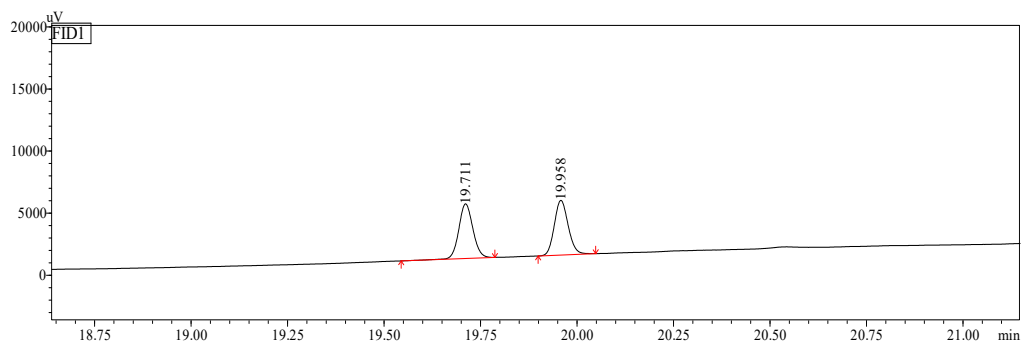

| Peak# | Ret. Time(min) | Height(uV) | Area(uV*s) | Area% |
|-------|----------------|------------|------------|-------|
| 1     | 19.711         | 4380       | 11187      | 50.4  |
| 2     | 19.958         | 4387       | 11002      | 49.6  |

Reduction with M5

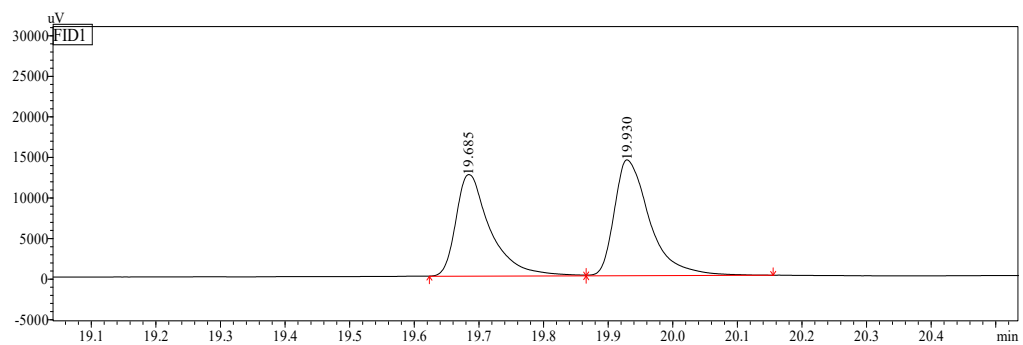

| Peak# | Ret. Time(min) | Height(uV) | Area(uV*s) | Area% |
|-------|----------------|------------|------------|-------|
| 1     | 19.685         | 12456      | 46543      | 46.2  |
| 2     | 19.930         | 14252      | 54229      | 53.8  |

Reduction with M0

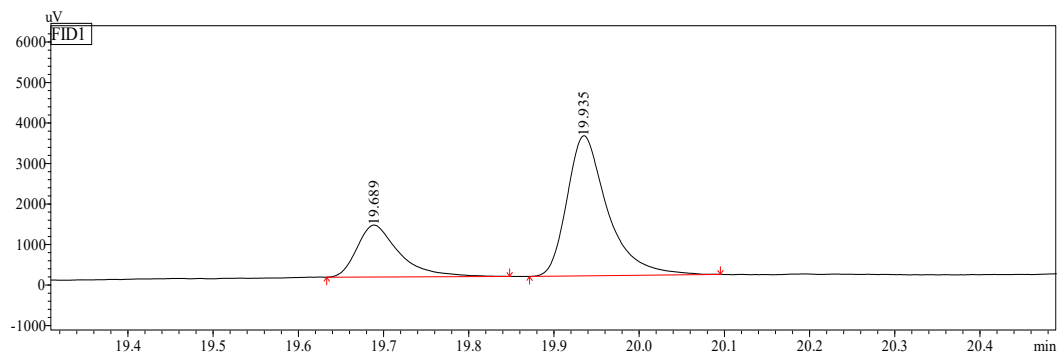

| Peak# | Ret. Time(min) | Height(uV) | Area(uV*s) | Area% |
|-------|----------------|------------|------------|-------|
| 1     | 19.689         | 1274       | 4403       | 27.8  |
| 2     | 19.935         | 3448       | 11430      | 72.2  |

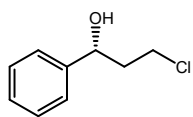

(2c)

Racemic mixture of 2c

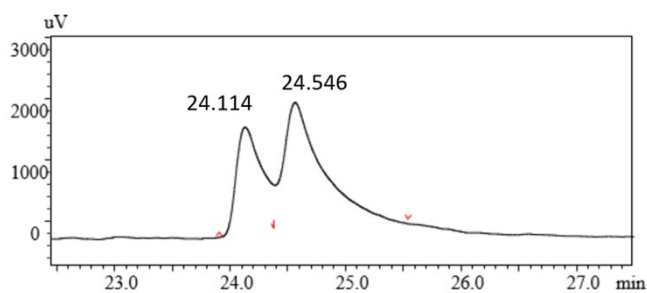

| Peak# | Ret. Time(min) | Height(uV) | Area(uV*s) | Area% |
|-------|----------------|------------|------------|-------|
| 1     | 24.114         | 1763       | 28246      | 35.2  |
| 2     | 24.546         | 2114       | 52030      | 64.8  |

Reduction with M5

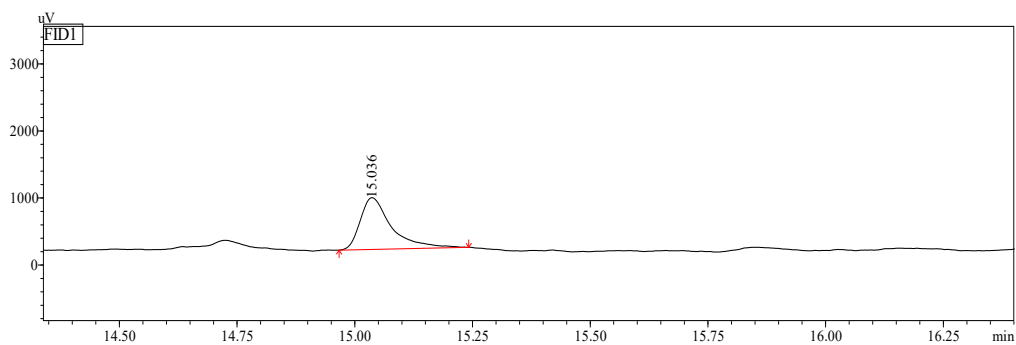

| Peak# | Ret. Time(min) | Height(uV) | Area(uV*s) | Area% |
|-------|----------------|------------|------------|-------|
| 1     | 15.036         | 769        | 3558       | 100   |

Reduction with M0

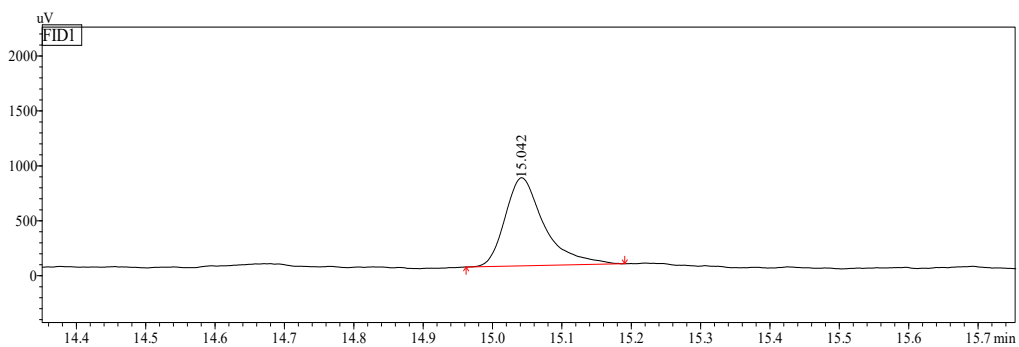

| Peak# | Ret. Time(min) | Height(uV) | Area(uV*s) | Area% |
|-------|----------------|------------|------------|-------|
| 1     | 15.042         | 798        | 3139       | 100   |

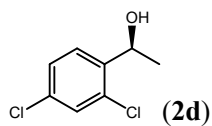

Racemic mixture of **2d**

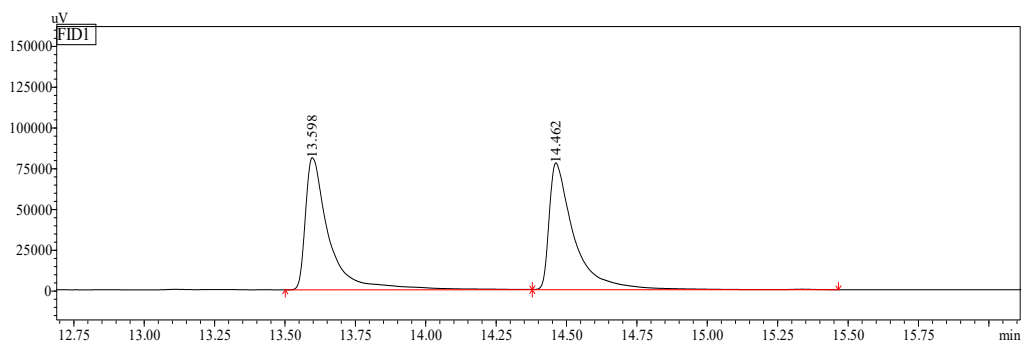

| Peak# | Ret. Time(min) | Height(uV) | Area(uV*s) | Area% |
|-------|----------------|------------|------------|-------|
| 1     | 13.598         | 80963      | 476459     | 49.9  |
| 2     | 14.462         | 77522      | 479036     | 50.1  |

Reduction with M5

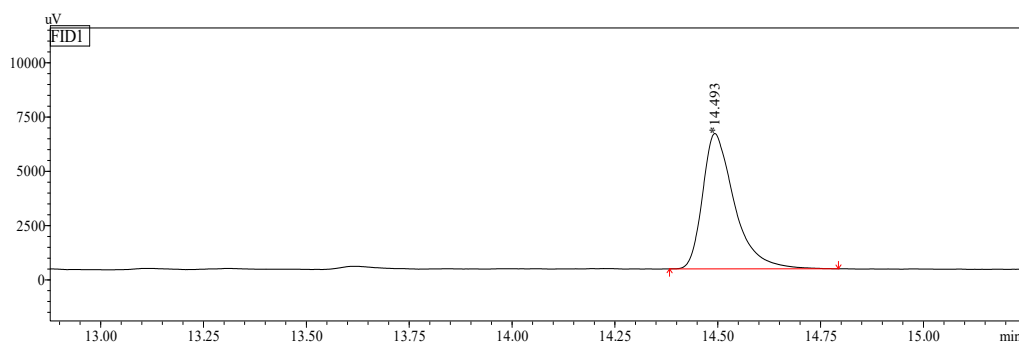

| Peak# | Ret. Time(min) | Height(uV) | Area(uV*s) | Area% |
|-------|----------------|------------|------------|-------|
| 1     | 14.493         | 6228       | 33501      | 100   |

Reduction with M0

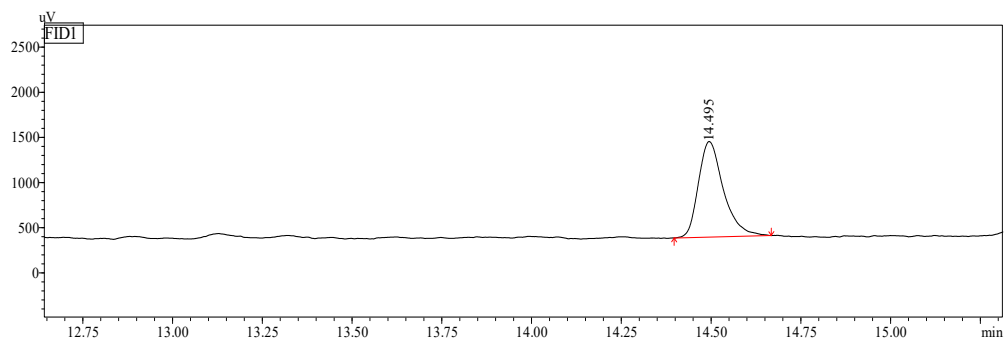

| Peak# | Ret. Time(min) | Height(uV) | Area(uV*s) | Area% |
|-------|----------------|------------|------------|-------|
| 1     | 14.495         | 1056       | 5136       | 100   |

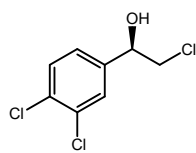

Racemic mixture of **2e**

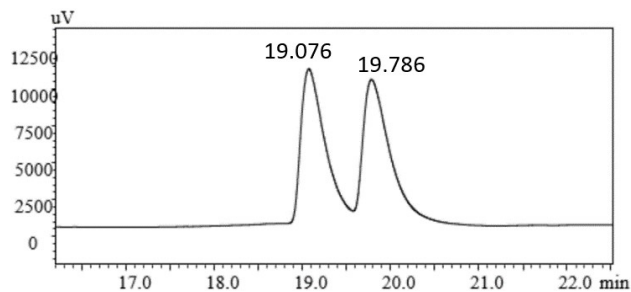

| Peak# | Ret. Time(min) | Height(uV) | Area(uV*s) | Area% |
|-------|----------------|------------|------------|-------|
| 1     | 19.076         | 10469      | 202986     | 48.5  |
| 2     | 19.786         | 9785       | 214919     | 51.5  |

Reduction with M5

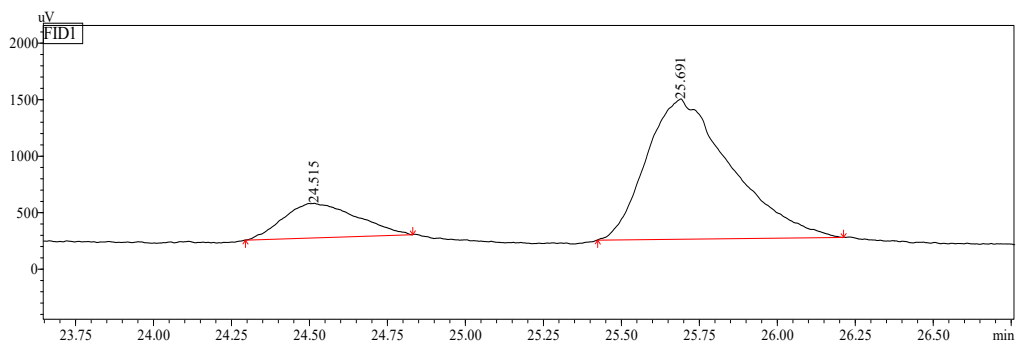

| Peak# | Ret. Time(min) | Height(uV) | Area(uV*s) | Area% |
|-------|----------------|------------|------------|-------|
| 1     | 24.515         | 305        | 5015       | 17.6  |
| 2     | 25.691         | 1239       | 23434      | 82.4  |

Reduction with M0

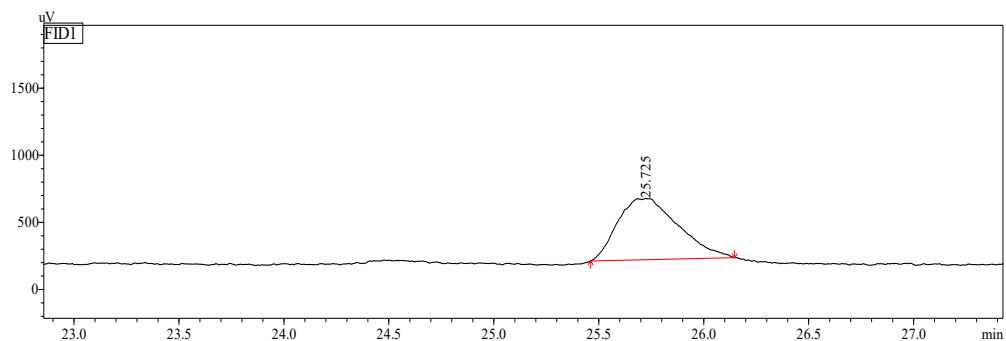

| Peak# | Ret. Time(min) | Height(uV) | Area(uV*s) | Area% |
|-------|----------------|------------|------------|-------|
| 1     | 25.725         | 456        | 9165       | 100   |

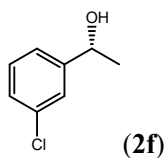

Racemic mixture of **2f**

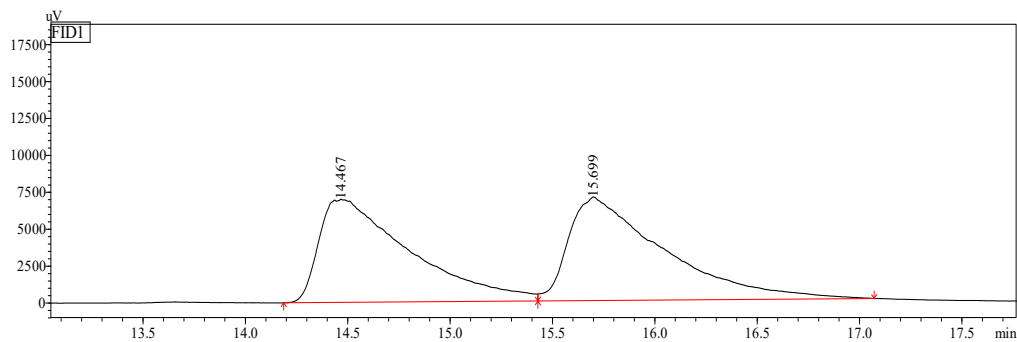

| Peak# | Ret. Time(min) | Height(uV) | Area(uV*s) | Area% |
|-------|----------------|------------|------------|-------|
| 1     | 14.467         | 6976       | 215158     | 48.7  |
| 2     | 15.699         | 7009       | 226422     | 51.3  |

Reduction with M5

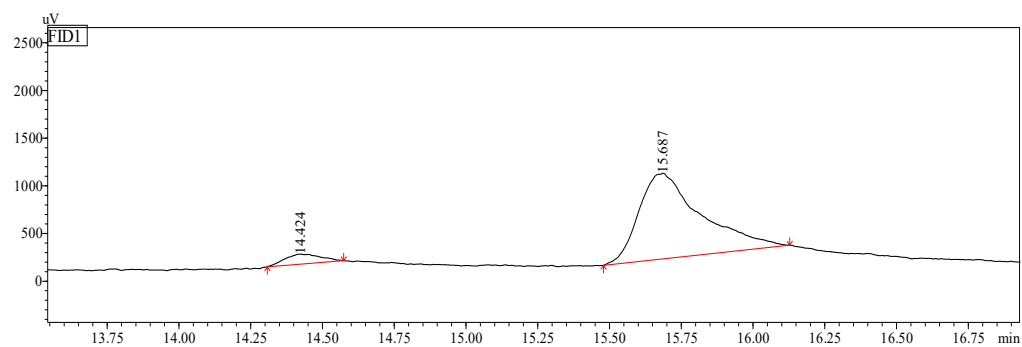

| Peak# | Ret. Time(min) | Height(uV) | Area(uV*s) | Area% |
|-------|----------------|------------|------------|-------|
| 1     | 14.424         | 104        | 900        | 6.2   |
| 2     | 15.687         | 898        | 13542      | 93.8  |

Reduction with M0

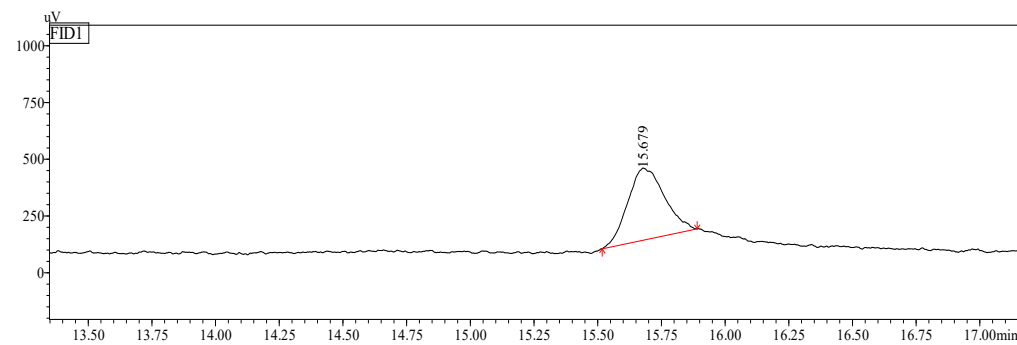

| Peak# | Ret. Time(min) | Height(uV) | Area(uV*s) | Area% |
|-------|----------------|------------|------------|-------|
| 1     | 15.679         | 317        | 3174       | 100   |

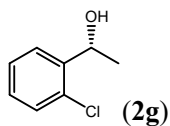

Racemic mixture of 2g

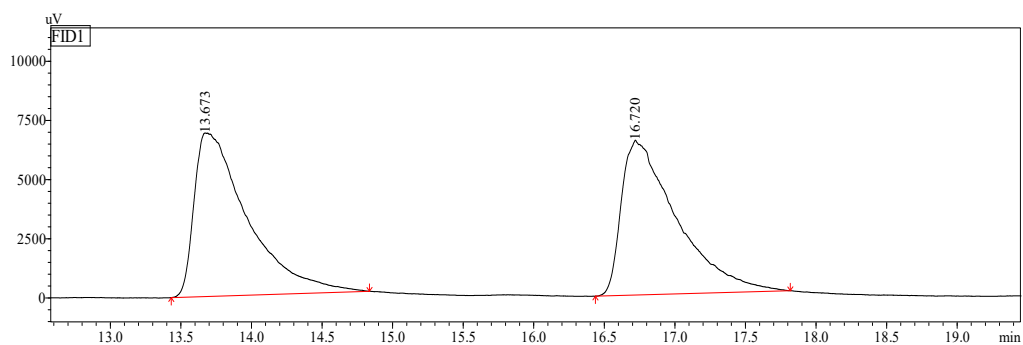

| Peak# | Ret. Time(min) | Height(uV) | Area(uV*s) | Area% |
|-------|----------------|------------|------------|-------|
| 1     | 13.673         | 6907       | 181142     | 50.5  |
| 2     | 16.720         | 6541       | 177697     | 49.5  |

Reduction with M5

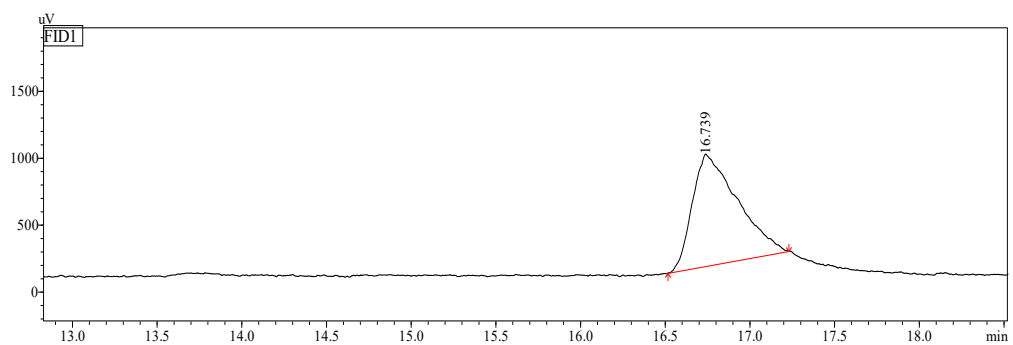

| Peak# | Ret. Time(min) | Height(uV) | Area(uV*s) | Area% |
|-------|----------------|------------|------------|-------|
| 1     | 16.739         | 839        | 15502      | 100   |

Reduction with M0

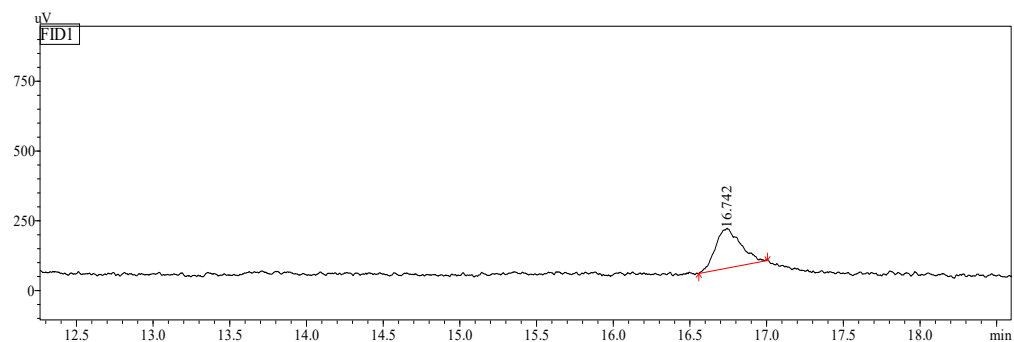

| Peak# | Ret. Time(min) | Height(uV) | Area(uV*s) | Area% |
|-------|----------------|------------|------------|-------|
| 1     | 16.742         | 143        | 1640       | 100   |

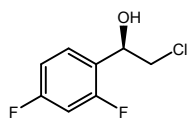

Racemic mixture of 2h

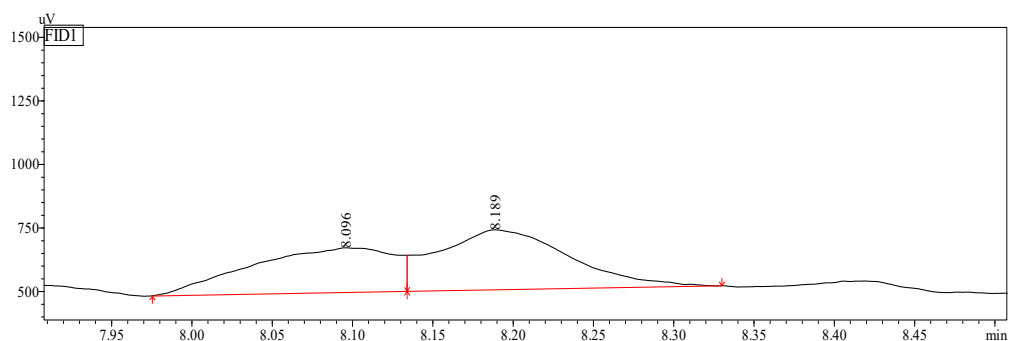

| Peak# | Ret. Time(min) | Height(uV) | Area(uV*s) | Area% |
|-------|----------------|------------|------------|-------|
| 1     | 8.096          | 176        | 1099       | 45.0  |
| 2     | 8.189          | 236        | 1348       | 55.0  |

Reduction with M5

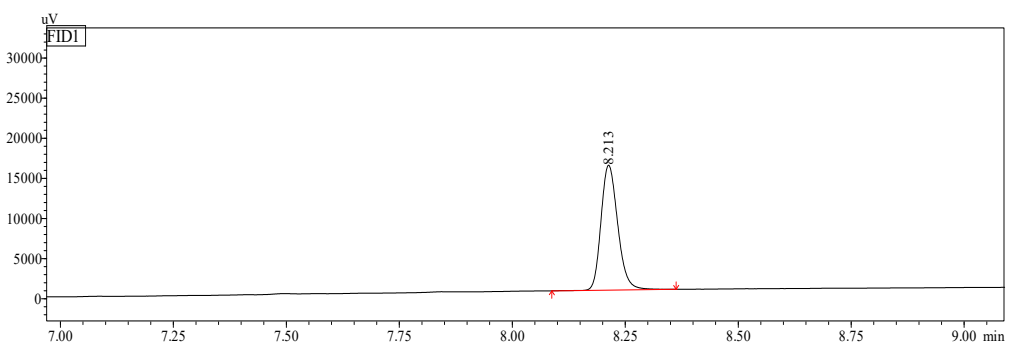

| Peak# | Ret. Time(min) | Height(uV) | Area(uV*s) | Area% |
|-------|----------------|------------|------------|-------|
| 1     | 8.213          | 15445      | 40203      | 100   |

Reduction with M0

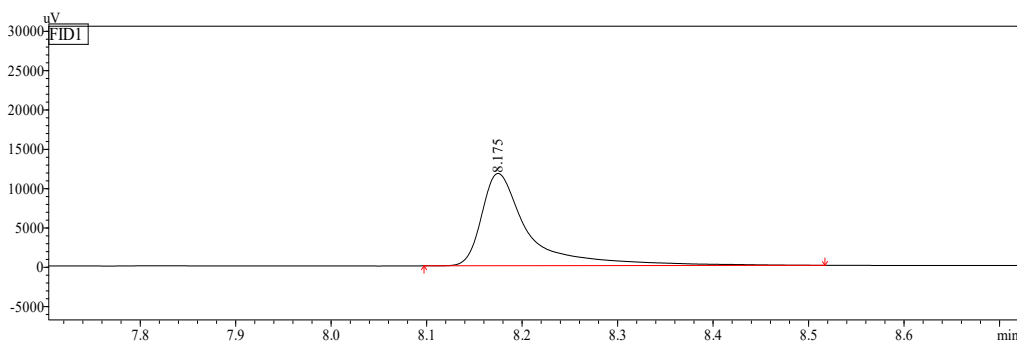

| Peak# | Ret. Time(min) | Height(uV) | Area(uV*s) | Area% |
|-------|----------------|------------|------------|-------|
| 1     | 8.175          | 11696      | 40136      | 100   |



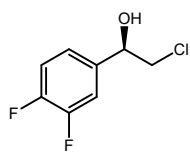

Racemic mixture of 2i

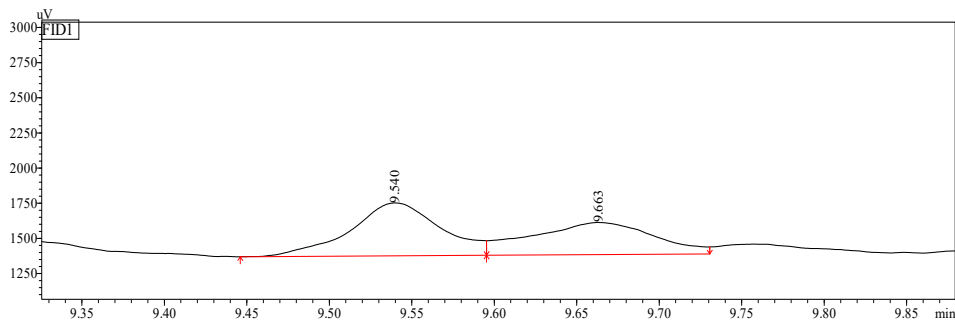

| Peak# | Ret. Time(min) | Height(uV) | Area(uV*s) | Area% |
|-------|----------------|------------|------------|-------|
| 1     | 9.540          | 374        | 1431       | 54.8  |
| 2     | 9.663          | 228        | 1182       | 45.2  |

Reduction with M5

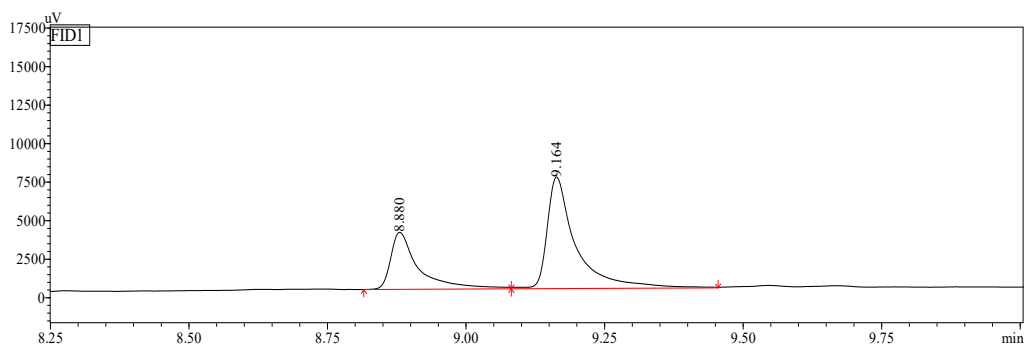

| Peak# | Ret. Time(min) | Height(uV) | Area(uV*s) | Area% |
|-------|----------------|------------|------------|-------|
| 1     | 8.880          | 3677       | 13027      | 33.1  |
| 2     | 9.164          | 7221       | 26293      | 66.9  |

Reduction with M0

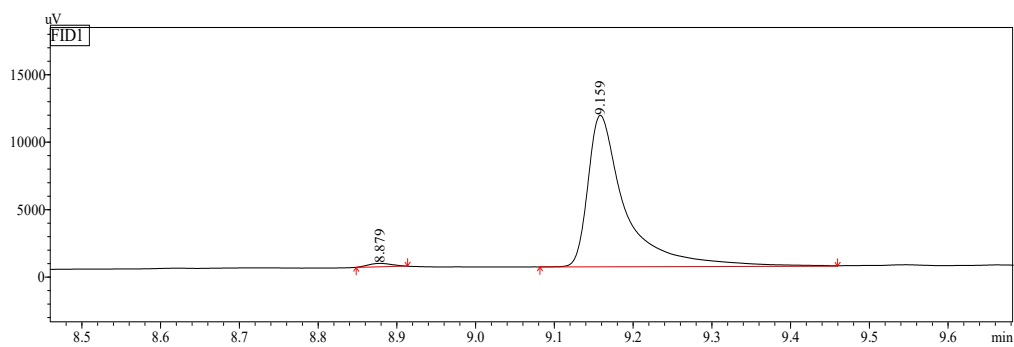

| Peak# | Ret. Time(min) | Height(uV) | Area(uV*s) | Area% |
|-------|----------------|------------|------------|-------|
| 1     | 8.879          | 252        | 532        | 1.4   |
| 2     | 9.159          | 11185      | 37528      | 98.6  |

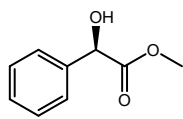

(2j)

Racemic mixture of 2j

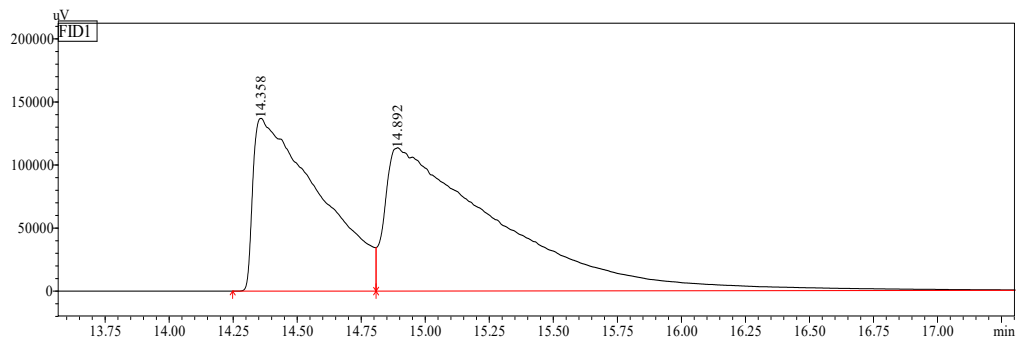

| Peak# | Ret. Time(min) | Height(uV) | Area(uV*s) | Area% |
|-------|----------------|------------|------------|-------|
| 1     | 14.358         | 136945     | 2477258    | 41.0  |
| 2     | 14.892         | 113459     | 3562963    | 59.0  |

Reduction with M5

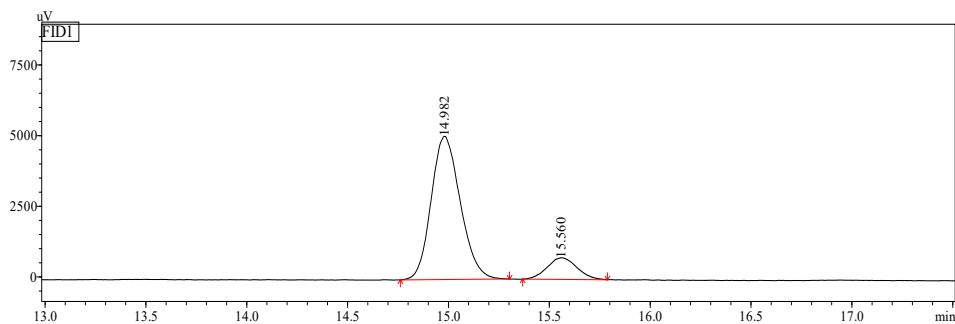

| Peak# | Ret. Time(min) | Height(uV) | Area(uV*s) | Area% |
|-------|----------------|------------|------------|-------|
| 1     | 14.982         | 5064       | 50961      | 86.6  |
| 2     | 15.560         | 765        | 7874       | 13.4  |

Reduction with M0

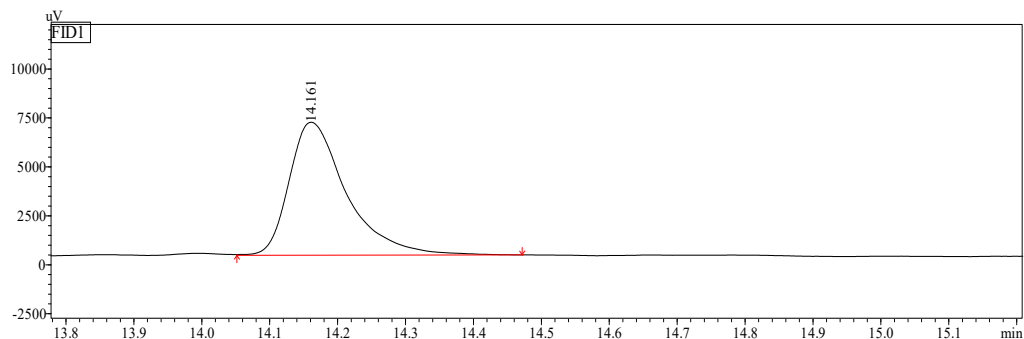

| Peak# | Ret. Time(min) | Height(uV) | Area(uV*s) | Area% |
|-------|----------------|------------|------------|-------|
| 1     | 14.161         | 6788       | 39848      | 100   |
